# Supplementary material for: New Paralogs of the Heliothis virescens ABCC2 Transporter as Potential Receptors for Bt Cry1A Proteins
Source: MDPI journal article supplement (doi:10.3390/biom14040397), 2024-03-26
Supplement: s1 [file s1]

**Supplementary Table S1.** Primers used in PCR and sequencing of *HvABCC3* and *HvABCC4*, and qPCR of *Rps18*, *HvABCC2*, *HvABCC3* and *HvABCC4* from *Heliothis virescens*.

| Function   | Target                 | Name            | Sequence (5'-3')           |
|------------|------------------------|-----------------|----------------------------|
| Sequencing | <i>HvABCC3</i><br>gene | HvABCC3_5UTR3_F | GCGGAACTCTCCACATTGTC       |
|            |                        | HvABCC3_526_R   | CATCTTCATACCGAACTGCTGGC    |
|            |                        | HvABCC3_356_F   | GGCATCTCCATTGCTGTTTAGTC    |
|            |                        | HvABCC3_1440_R  | CAAAGCAGTGTCTGCTGGTATG     |
|            |                        | HvABCC3_1331_F  | ATCGCAAATCGGATGGAGC        |
|            |                        | HvABCC3_2272_R  | GGTTGCCTGACTGCCTCTCC       |
|            |                        | HvABCC3_2153_F  | GAAGCATTGATGAGAAGGACAGGC   |
|            |                        | HvABCC3_3468_R  | TATCAGGGAAGATTTGCCAGC      |
|            |                        | HvABCC3_3377_F  | AGCCCGTATTGAAGAACCTGAAC    |
|            |                        | HvABCC3_3UTR3_R | TGCCTACTCTACATTACTATTACAAG |
| Sequencing | <i>HvABCC4</i><br>gene | HvABCC4_5UTR2_F | GGACTCTAAGCCCGAGGACAT      |
|            |                        | HvABCC4_552_R   | GAGTGAGCAGGCGGCGATG        |
|            |                        | HvABCC4_464_F   | TGTCGCTGGTCATCGCCTTC       |
|            |                        | HvABCC4_1381_R  | TGCACTCGAATCCAGGGTTG       |
|            |                        | HvABCC4_1219_F  | CGAGAGGATCTCCGCACTGTG      |
|            |                        | HvABCC4_2080_R  | CCCTGTGCTACTAATTCTGTCG     |
|            |                        | HvABCC4_1970_F  | TCCTCGTCACGCATCAACTC       |
|            |                        | HvABCC4_2794_R  | ATTATCGAGGGCTCCAATGTC      |
|            |                        | HvABCC4_2673_F  | CCGCAACCTCCACAACGAC        |
|            |                        | HvABCC4_3611_R  | CAACGTCGTCAATGAGCACTTC     |
|            |                        | HvABCC4_3448_F  | ACGCCCCGAAGACTTGCCAG       |
|            |                        | HvABCC4_3UTR5_R | ACGAAACTACATAGAGAAGGACACTG |
| qPCR       | <i>Rps18</i> gene      | Rps18_Forw      | ATGGCAAACGCAAGGTTATGTTT    |
|            |                        | Rps18_Rev       | TTGTCAAGATCAATGTCGGCTTT    |
|            | <i>HvABCC2</i> gene    | HvABCC2_Forw    | TGCGCTAGCCATGCTGGGACT      |
|            |                        | HvABCC2_Rev     | ACCGACACTTGAGTCATGCGGAGCA  |
|            | <i>HvABCC3</i> gene    | HvABCC3_Forw    | CCACGGTGCACTGTATTGCC       |
|            |                        | HvABCC3_Rev     | CCGTCGTCTCAGCCAGTGAA       |
|            | <i>HvABCC4</i> gene    | HvABCC4_Forw    | GGCGAGCAAGCAGGGCCGTA       |
|            |                        | HvABCC4_Rev     | GCTAACGCCACTGGTTGGAAAGGC   |
